# Supplementary material for: Transcriptome sequencing analysis of alfalfa reveals CBF genes potentially playing important roles in response to freezing stress
Source: PubMed Central journal article supplement (PMC5738619; doi:10.1590/1678-4685-gmb-2017-0053), 2017-11-06

## Supplementary Material to “Transcriptome sequencing analysis of alfalfa reveals CBF genes potentially playing important roles in response to freezing stress”

Figure S3 - qRT-PCR validation of 10 MsERF genes expressed in response to cold and freezing stress.

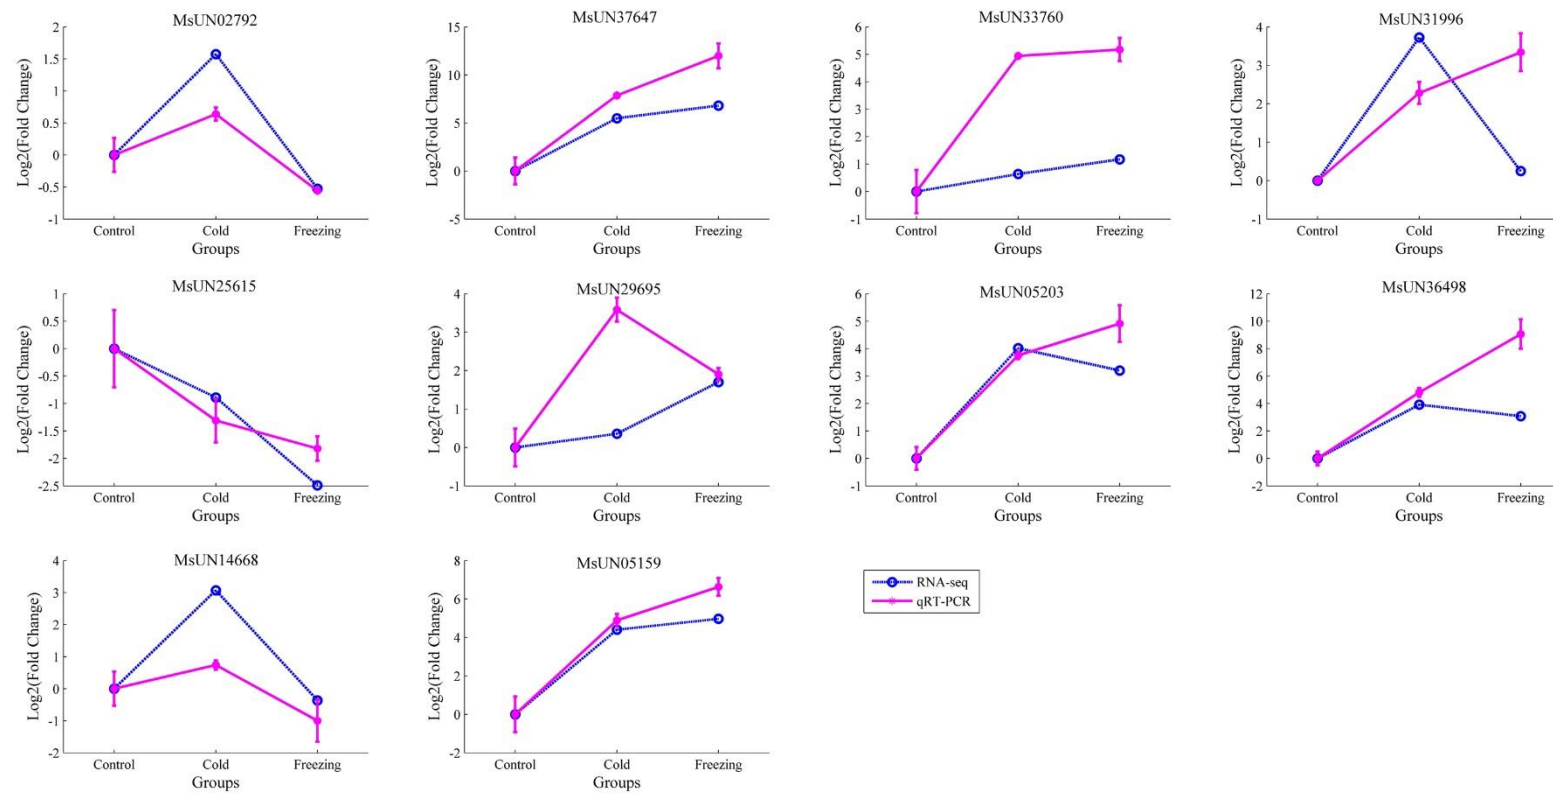

Supplement: 1415-4757-gmb-1678-4685-GMB-2017-0053-Suppl03.pdf [file 1415-4757-gmb-1678-4685-GMB-2017-0053-Suppl03.pdf]
